1 **Salidroside protects lipopolysaccharide-induced acute lung injury**  
2 **by regulating miR-145/ cytosolic phospholipase A<sub>2</sub>**

3

4 Lanxin Gu <sup>a</sup>, Zhaoling Shi <sup>b,\*</sup>

5

6 <sup>a</sup> University of Southern California, Los Angeles, CA 90089, United States.

7 <sup>b</sup> Department of Pediatrics, Second Affiliated Hospital of Shaanxi University of Chinese  
8 Medicine, Xianyang 712000, China.

9

10

11 **Short Title:** Salidroside attenuates acute lung injury

12

13 **Word count:** 4600

14

15

16

17 **Correspondence to:**

18 Zhaoling Shi, M.D., Ph. D.

19 Department of Pediatrics, Second Affiliated Hospital, Shaanxi University of Chinese

20 Medicine, Xianyang 712000, China. Email: 1563450@email.sntcm.edu.cn; Tel: 86-29-

21 33350968

22

23

24

25

26

27

28

29

30

31

32 **Highlights:**

33

34 1. Salidroside reduces acute lung injury by inhibiting the increment and metabolism of  
35 phospholipase A2;

36 2. Salidroside inhibits LPS-induced PLA2 increase dependent on miR-145;

37 3. The inhibitory effect of Salidroside on Phospholipases A2 provides a link between  
38 the identification of new targets and potential new therapeutic agents for the  
39 treatment of acute lung injury.

40

41

42

43

44

45

46

47

48

49

50

51

52

53

54

55

56

57

58

59

60

61

62

63

64 **Abstract**

65 Salidroside is one of the main active components from the root of *Rhodiola rosea*. Previous  
66 reports showed that salidroside exhibits anti-inflammatory properties, but the underlying  
67 mechanisms are not fully understood. Here, we observed the effects of salidroside on  
68 lipopolysaccharide (LPS)-induced acute lung injury (ALI) both *in vivo* and *in vitro*. As revealed  
69 by survival study, salidroside reduced mortality of rats and prolonged their survival time.  
70 Meanwhile, salidroside significantly improved LPS-induced lung histopathologic changes,  
71 decreased lung wet-to-dry and lung-to-body weight ratios, inhibited lung myeloperoxidase  
72 (MPO) activity. Salidroside also suppressed the expression of cytosolic PLA<sub>2</sub> (cPLA<sub>2</sub>), the  
73 activity of phospholipase A<sub>2</sub> (PLA<sub>2</sub>) in LPS-treated rats and the metabolites of PLA<sub>2</sub> in  
74 bronchoalveolar lavage fluid (BALF), which was confirmed by results of prostaglandin E<sub>2</sub>  
75 (PGE<sub>2</sub>), leukotriene B<sub>4</sub> (LTB<sub>4</sub>) and thromboxane B<sub>2</sub> (TXB<sub>2</sub>) detection. And the expression of  
76 microRNA-145 in LPS-treated rats was up-regulated by salidroside. Besides, salidroside raised  
77 the level of miR-145 and reduced PLA<sub>2</sub> activity in LPS-induced A549 cells in a concentration-  
78 dependent manner, which was obviously reversed by miR-145 inhibition. In conclusion, the  
79 current study demonstrated that salidroside exhibited a protective effect on LPS-induced ALI  
80 by inhibiting of the inflammatory response, which may involve in the up-regulation of miR-  
81 145 and the suppression of cPLA<sub>2</sub>.

82

83

84 **Keywords:** Salidroside; Acute lung injury (ALI); microRNA-145; Phospholipase A<sub>2</sub> (PLA<sub>2</sub>).

85

86

87

88

89

## 90 **1. Introduction**

91 Acute lung injury (ALI) and acute respiratory distress syndrome (ARDS), the common  
92 and devastating clinical syndromes of acute respiratory failure in the critically ill ICU patients  
93 with high rates of morbidity and mortality[1, 2], are characterized by severe hypoxemia and  
94 uncontrolled accumulation of inflammatory cells into different compartments of the lungs, and  
95 accompanied by cytokine release and inflammatory activation of recruited or resident cells[3,  
96 4]. Despite prosperous improvement in the treatment of ALI/ARDS, there is still a tremendous  
97 need to explore the underlying pathophysiological mechanisms of ALI/ARDS and to prevent  
98 and cure these syndromes.

99 Phospholipases A<sub>2</sub> (PLA<sub>2</sub>), an ubiquitous superfamily of enzymes implicated in various  
100 inflammatory processes, catalyzes the hydrolysis of membrane phospholipids generating pro-  
101 inflammatory mediators such as thromboxanes, prostaglandins, leukotrienes and platelet-  
102 activating factor[5, 6], which are potentially involved in the development of ALI/ARDS[7, 8].  
103 Therefore, PLA<sub>2</sub> is a key enzyme for the production of these inflammatory mediators and plays  
104 an important role in ALI/ARDS. Inhibition of its activity may be a useful therapeutic strategy  
105 against inflammation.

106 Salidroside, an active constituent extracted from the root of *Rhodiola rosea*, exhibits many  
107 biological activities including anti-aging, anti-cancer, anti-inflammatory, anti-hypoxia and anti-  
108 oxidative properties[9-11], and has been commonly used in traditional oriental herbal medicine  
109 for diabetes, hypertension, fatigue and hypoxia[12, 13]. Previous study showed that salidroside  
110 possessed potentially beneficial anti-eicosanoid properties by suppressing the release of  
111 prostaglandin E<sub>2</sub> (PGE<sub>2</sub>) and reducing the levels of thromboxanes B<sub>2</sub> (TXB<sub>2</sub>) *in vitro* [13].  
112 However, little is known about its mechanism. Additionally, the crucial effect of miRNAs on  
113 ALI/ARDS has been confirmed in recent researches[14]. It has been reported that miRNAs act  
114 as key regulators to control the process of inflammation, metabolism and repair in alveolar

115 epithelial cells. As an important miRNA, miR-145 can be regulated by solidoside in a  
116 concentration-dependent manner in osteoarthritis injury model[15]. However, the role of  
117 solidoside and miR-145 in ALI/ARDS remains not fully investigated. In this study, therefore,  
118 we explore the effects and the underlying mechanism of solidoside on lipopolysaccharide  
119 (LPS)-induced acute lung injury both *in vivo* and *in vitro*. Results demonstrate that solidoside  
120 reduced lethality in LPS-treated rats and significantly attenuated the severity of lung injury,  
121 which was probably associated with the up-regulation of miR-145 and the inhibition of cPLA<sub>2</sub>.

## 122 **2. Material and Methods**

### 123 *2.1 Animals and reagents*

124 Adult male Sprague-Dawley rats (7–8 weeks old, and 200–250g weight) were obtained  
125 from the animal center (Fourth Military Medical University, Xi'an, and P. R. China). Rats were  
126 kept in a temperature-controlled house with 12-hour light-dark cycles. All experiments were  
127 approved by Animal Care and Use Committee at Fourth Military Medical University and were  
128 in accordance with the Declaration of the National Institutes of Health Guide for Care and Use  
129 of Laboratory Animals (Publication No.85-23, revised 1985).

130 Solidoside (purity is 99%, structure shown in Fig. 1A) was purchased from the National  
131 Institute for the Control of Pharmaceutical and Biological Products (NICPBP, Beijing, China).  
132 The enzyme-linked immunosorbent assay (ELISA) kits for prostaglandin E<sub>2</sub> (PGE<sub>2</sub>) and  
133 leukotriene B<sub>4</sub> (LTB<sub>4</sub>) were obtained from R&D Systems Inc. (Minneapolis, MN, USA). The  
134 kit for determination of myeloperoxidase (MPO) activity was obtained from Jiancheng  
135 Bioengineering Institute (Nanjing, China). Thromboxane B<sub>2</sub> (TXB<sub>2</sub>) radioimmunoassay kit was  
136 purchased from Radioimmunoassay Institute of General Hospital of PLA (Beijing, China).  
137 Anti-cPLA<sub>2</sub> and  $\beta$ -actin monoclonal antibodies were obtained from Santa Cruz Biotechnology  
138 Inc. (Santa Cruz, CA, USA). The EnzChek® phospholipaseA<sub>2</sub> assay kit, DMEM medium and  
139 fetal bovine serums were purchased from Invitrogen Inc. (Carlsbad, CA, USA). LPS

140 (Escherichia coli lipopolysaccharide, 055:B5), all the other reagents were obtained from Sigma  
141 Sigma-Aldrich Inc. (St. Louis, MO, USA). The purity of all chemical reagents was at least  
142 analytical grade.

### 143 *2.2 Survival studies*

144 For the assessment of mortality rates, rats were given intraperitoneally 20 mg/kg LPS with  
145 or without different doses of salidroside (25, 50 or 100 mg/kg) treatment 0.5 h after LPS  
146 injection. The mortality of rats was recorded every 12 h for 3 days after the LPS injection.  
147 Experiments were performed with littermate rats and each group contains 15 animals.

### 148 *2.3 Model and grouping*

149 To further study the role of salidroside on ALI, rats were randomly divided into 4 groups,  
150 1) Control group ( $n = 10$ ) and 2) Salidroside group ( $n = 10$ ): rats received saline or 100 mg/kg  
151 of salidroside intraperitoneally; 3) LPS group ( $n = 10$ ): rats received 10 mg/kg of LPS  
152 intraperitoneally; 4) LPS+ salidroside group ( $n = 10$ ): 100 mg/kg of salidroside was  
153 administered intraperitoneally 0.5 h after LPS administration. In all groups, measurements were  
154 made at 6 h after LPS or saline administration.

### 155 *2.4 Histological study*

156 At the end of experiments, the lower lobe of the right lung was fixed with 10% formalin  
157 for 24 h. After fixation, the tissues were embedded in paraffin and cut into 5  $\mu\text{m}$  sections, and  
158 then stained with hematoxylin-eosin. Microscopic evaluation was performed to characterize  
159 lung injury.

### 160 *2.5 Myeloperoxidase (MPO) activity assay and lung wet/dry ratios assessment*

161 The upper lobe of the right lung was removed and MPO activity was measured. Briefly,  
162 the weighed lung tissue samples were frozen and homogenized in cool normal saline. The  
163 homogenates were then performed according to the manufacturer's instructions.

164 The remaining lung tissues were weighed immediately (wet weight), and then dried to  
165 constant weight at 50 °C for 72 h and weighed again (dry weight). The ratios of lung wet/dry  
166 weight were finally calculated to quantify the magnitude of pulmonary edema.

#### 167 *2.6 Preparation of bronchoalveolar lavage fluid (BALF) and measurements*

168 BALF was performed (3 ml ice-cold phosphate-buffered saline three times) in all groups.  
169 In each rat, 90% (2.7ml) of the total injected volume was consistently recovered. After BALF  
170 was centrifuged at 1000g for 20 min at 4 °C, the supernatant was stored at -70 °C for subsequent  
171 measurements.

#### 172 *2.7 Enzyme-linked immunosorbent assay (ELISA) and radioimmunoassay*

173 BALF samples were added into a 96-well plate. The concentrations of prostaglandin E<sub>2</sub>  
174 (PGE<sub>2</sub>) and leukotriene B<sub>4</sub> (LTB<sub>4</sub>) in BALF were determined by using commercially available  
175 ELISA kits according to the manufacturer's instructions, respectively. These assay are based  
176 on the forward sequential competitive binding technique in which PGE<sub>2</sub> or LTB<sub>4</sub> presents in a  
177 sample competes with horseradish peroxidase (HRP)-labeled PGE<sub>2</sub> or LTB<sub>4</sub> for a limited  
178 number of binding sites on the primary polyclonal antibody. PGE<sub>2</sub> or LTB<sub>4</sub> in the sample is  
179 allowed to bind to the antibody in the first incubation. During the second incubation, HRP-  
180 labeled PGE<sub>2</sub> or LTB<sub>4</sub> binds to the remaining antibody sites. Following a wash to remove  
181 unbound materials, a substrate solution is added to the wells to determine the bound enzyme  
182 activity. The color development is stopped, and the absorbance is read at 450 nm. The intensity  
183 of the color is inversely proportional to the concentration of PGE<sub>2</sub> or LTB<sub>4</sub> in the sample.

184 The levels of thromboxane B<sub>2</sub> (TXB<sub>2</sub>) was determined by radioimmunoassay kit according  
185 to the manufacturer's instructions. Briefly, the BALF samples were thawed and incubated  
186 overnight at 4°C with iodine 125 labeled TXB<sub>2</sub> and anti-TXB<sub>2</sub> serum in a gamma globulin  
187 buffer. The next day, bound and free fractions were separated by polyethyleneglycol 6000

188 precipitation followed by centrifugation at 2000g at 40C for 10 min. The radioactivity of the  
189 pellet corresponding to the bound fraction was counted for 1 min in a gamma counter.

### 190 *2.8 Western blot analysis for cPLA<sub>2</sub>*

191 Total proteins in lung tissues were extracted. Protein concentrations were assayed using a  
192 coomassie brilliant blue assay. Samples were separated on a denaturing 12% SDS-  
193 polyacrylamide gel and transferred to a nitrocellulose membrane followed by incubation with  
194 primary antibodies for cPLA<sub>2</sub> (1:500). Anti-β-actin antibody was used at a dilution of 1:10,000.  
195 Immunoreactivity was visualized with corresponding peroxidase-conjugated secondary  
196 antibodies and the relative content of target proteins was detected by chemiluminescence.

### 197 *2.9 Cell culture*

198 The human lung adenocarcinoma epithelial cell line, A549 cells obtained from American  
199 type culture collection (ATCC, Rockville, MD, USA), were maintained in DMEM medium  
200 supplemented with 10% fetal calf serum, 100 U/ml of penicillin and 100 µg/ml of streptomycin  
201 at 37 °C in a humidified atmosphere containing 5% CO<sub>2</sub> and 95% air. The medium was changed  
202 every 3-4 d. The stock solutions of all the drugs were prepared in DMEM medium.

### 203 *2.10 Methyl thiazolyl tetrazolium (MTT) assay*

204 Cell viability was measured using the MTT assay. Briefly, A549 cells were respectively  
205 seeded into 96-well plates at  $1 \times 10^5$  cells/ml, and incubated in DMEM medium supplemented  
206 with 5% fetal calf serum for 24 h. Next, the cells were activated with 1µg/ml of LPS for 24 h  
207 in the presence or absence of salidroside (0, 0.5, 1, 2µM) for another 2 h. Then 5µl of MTT  
208 solution in PBS (5 mg/ml) was added to each well. After 4 h of incubation, MTT solution was  
209 discarded carefully, and 100µl of pure dimethyl sulfoxide was added to each well to dissolve  
210 the formazan crystals. The amount of MTT formazan was quantified spectrophotometrically by  
211 measuring the absorbance at 550 nm. Each concentration was tested in triplicate.

### 212 *2.11 Quantitative real-time polymerase chain reaction (qRT-PCR)*



213 qRT-PCR was used to detect the expression of miR-145 in lung tissues and A549 cells.  
214 Total RNA was isolated from tissues or cells by using TRIzol reagent(Invitrogen) according  
215 to the manufacturer's protocol. Reverse transcription was performed by using cDNA Reverse  
216 Transcriptase Kit (Applied Biosystems, California, Carlsbad, USA). qRT-PCR was performed  
217 by using One Step SYBR® PrimeScript® PLUS RT-RNA PCR Kit (TaKaRa Biotechnology,  
218 Dalian, China). Relative expression levels were analyzed by using the  $2^{-\Delta\Delta CT}$  method.

### 219 *2.12 miRNAs transfection*

220 The expression plasmids of miR-145 inhibitor and its control were synthesized by Sheng  
221 Gong Co. (Shanghai, China). In brief, A549 cells were grown in 96-well plates at  $1 \times 10^5$  cells/ml,  
222 and incubated for 24h. Subsequently, miR-145 inhibitor and its control were transfected into  
223 A549 cells by using Lipofectamine 3000 reagent (Invitrogen, USA) following the  
224 manufacturer's instruction.

### 225 *2.13 PLA<sub>2</sub> activity assay in BALF and cell supernatant*

226 Measurements of PLA<sub>2</sub> activity in BALF and in A549 cell supernatants were made  
227 following the manufacturer's protocol to investigate the underlying mechanism that salidroside  
228 generated protective effects against LPS. PLA<sub>2</sub> from honey bee venom supplied with the kit  
229 was the positive control. The assay was conducted at 26°C, and fluorescence emission at 515  
230 nm was detected after an incubation step of 10 min by a SpectraMax® M5/M5e Microplate  
231 Reader (Molecular Devices, CA, USA). The PLA<sub>2</sub> activity in control (medium alone) cells was  
232 taken as 100%.

### 233 *2.14 Statistical analysis*

234 Data are expressed as means  $\pm$  S.D., and statistical analysis was performed with analysis  
235 of variance (one-way ANOVA or two-way ANOVA), followed by a Tukey test for multiple  
236 comparisons. Survival data was presented by the Kaplan Meier method and comparisons were  
237 made by the log rank test. A statistical difference was accepted as significant if  $P < 0.05$ .

## 238 **3 Results**

### 239 *3.1 Salidroside reduced LPS-induced accumulative mortalities*

240 As shown in Fig. 1B, salidroside significantly reduced LPS-induced death. The  
241 accumulative mortalities during 3 days in 100 mg/kg of salidroside were about 60% which were  
242 observably lower than that in LPS group (about 80%,  $P<0.01$ ). But 25mg/kg and 50mg/kg of  
243 salidroside failed to protect against death ( $P>0.05$ ). Therefore 100mg/kg of salidroside was  
244 used to make further study.

### 245 *3.2 Salidroside improved LPS-induced lung injury*

246 Firstly, the lung wet/dry (W/D) weight and the lung/body weight ratios as the indexes of  
247 lung edema were detected (Fig. 1C-D). No significant difference was found between control  
248 group and salidroside group. In LPS group, the W/D weight ratios and the lung/body weight  
249 ratios were markedly increased compared with that of control group ( $P<0.01$ ), but  
250 administration with salidroside markedly reduced the lung edema ( $P<0.05$ ).

251 Secondly, we measured MPO activity to assess the neutrophil accumulation in the lung tissues.  
252 As Fig. 1E shown, LPS caused a marked increase in MPO activity compared with that of control  
253 group ( $P<0.01$ ). Salidroside treatment obviously suppressed MPO activity induced by LPS  
254 ( $P<0.05$ ). Similarly, salidroside also did not affect MPO activity in lung tissues of control group.

255 Next, we observed the pulmonary histological changes 6 h after LPS insult by microscope.  
256 Pulmonary tissue structure and alveoli in control group and salidroside group were normal. LPS  
257 instillation increased the inflammation score, caused pulmonary edema, infiltration of  
258 inflammatory cells, and alveolar damage. However, after salidroside treatment, these changes  
259 were less pronounced compared with those in LPS group (Fig. 1F-G).

260 *3.3 Salidroside inhibited LPS-induced increment of PLA<sub>2</sub> and its metabolites, and upregulate*  
261 *the level of miR-145 in rats*

262 We further examined the repressions of miR-145 and cPLA<sub>2</sub> in lung tissues, the activity  
263 of PLA<sub>2</sub> and the metabolites of PLA<sub>2</sub> in BALF to investigate the underlying mechanism that  
264 salidroside generated protective effects against LPS. Results showed that after LPS  
265 administration, the expression of miR-145 was significant declined, and the cPLA<sub>2</sub> was  
266 markedly increased (Fig. 2 A-B,  $P<0.01$ ), which was efficiently reversed by salidroside  
267 treatment ( $P<0.05$ ). And PLA<sub>2</sub> activity obtained from BALF in LPS-treated rats was markedly  
268 increased compared with that in control group ( $P<0.01$ ). But, the increment of PLA<sub>2</sub> activity  
269 induced by LPS was strongly inhibited by salidroside treatment ((Fig. 2 C,  $P<0.05$ ). Similar to  
270 PLA<sub>2</sub> activity, salidroside alone did not alter basal levels of PGE<sub>2</sub> (Fig.2 D), LTB<sub>4</sub> (Fig.4 E)  
271 and TXB<sub>2</sub> (Fig.4 F) in BALF. LPS administration markedly increased the levels of these  
272 eicosanoids ( $P<0.01$ , respectively), whereas salidroside evidently reduced the levels of these  
273 eicosanoids induced by LPS ( $P<0.05$ , respectively).

#### 274 *3.4 Salidroside reversed LPS-induced reduction of A549 cell viability, increased the level of* 275 *miR-145 and reduced LPS-induced PLA<sub>2</sub> increment*

276 MTT assays were conducted to verify the protective effects of salidroside on A549 cells.  
277 As shown in Fig. 3A, the concentration (0, 0.5, 1, 2 $\mu$ M) of salidroside had no effect on the  
278 viability of A549 cells. 1 $\mu$ g/ml of LPS markedly reduced the cell viability of A549 cells  
279 ( $P<0.01$ ), but salidroside reversed LPS-induced reduction of the viability of A549 cells in a  
280 concentration-dependent manner ( $P<0.05$ ).

281 To clarify the relationship between LPS-induced miR-145 and salidroside, A549 cells  
282 were treated with LPS and different doses of salidroside(0, 0.5, 1, 2 $\mu$ M), and the expression of  
283 miR-145 was examined by qRT-PCR. As shown in Fig. 3B, salidroside promoted the  
284 expression of miR-145 in a concentration-dependent manner with or without LPS-treated  
285 ( $P<0.05$ ). These above results suggested that miR-145 might be involved in regulation of LPS-  
286 induced inflammatory injury in A549 cells.

287 Additionally, the different doses of salidroside (0, 0.5, 1, 2 $\mu$ M) did not alter PLA<sub>2</sub> activity in  
288 A549 cell supernatants, but 1 $\mu$ g/ml of LPS significantly increased PLA<sub>2</sub> activity compared with  
289 those in control groups (Fig. 3C,  $P < 0.01$ ). Salidroside reduced LPS-induced PLA<sub>2</sub> activity in a  
290 concentration-dependent manner ( $P < 0.05$ ). Similarly, the expression of cPLA<sub>2</sub> induced by LPS  
291 was also suppressed (Fig. 3D,  $P < 0.05$ ).

### 292 *3.5 miR-145 inhibitor blocked the effects of salidroside on LPS-induced PLA<sub>2</sub> increment*

293 Firstly, miR-145 inhibitor and its corresponding control were transfected into A549 cells  
294 to further explore the relationship of salidroside and miR-145 on LPS-induced inflammatory  
295 injury. After transfection, the level of miR-145 was significantly down-regulated, and  
296 salidroside did not raise the level of miR-145 (Fig. 4B,  $P < 0.05$ ). Then, the effect of miR-145  
297 inhibitor on A549 cell viability, the activity of PLA<sub>2</sub> and the expression of cPLA<sub>2</sub> were assessed.  
298 In Fig. 4A, the results showed that miR-145 inhibitor significantly reversed the promoting  
299 effects of salidroside on A549 cell viability ( $P < 0.05$ ). Meanwhile, the inhibitory effects of  
300 salidroside on PLA<sub>2</sub> activity and cPLA<sub>2</sub> expression were also reversed by miR-145 inhibitor  
301 (Fig. 4C and D,  $P < 0.05$ , respectively). In a word, these results fully indicated that salidroside  
302 affected LPS induced injury by upregulation of miR-145 in A549 cells.

## 303 **4. Discussion**

304 In the present study, we demonstrated that salidroside played an important role in the  
305 protection of LPS-induced ALI. Results showed that salidroside could reduce mortality of rats  
306 and prolong their survival time, attenuate lung injury by inhibiting PLA<sub>2</sub> activity, suppressing  
307 the expression of cPLA<sub>2</sub>, and cutting down the generation of pro-inflammatory eicosanoids,  
308 which was probably associated with the up-regulation of miR-145 and the inhibition of cPLA<sub>2</sub>,  
309 and indicated therapeutic potential for salidroside in the treatment of ALI.

310 *Rhodiola rosea* (*R. rosea*) is known as a golden or arctic root and belongs to the plant  
311 family of Crassulaceae, subfamily of Sedoideae, and genus *Rhodiola*. [13] It is clinically used

312 in China or many Asian countries either alone or in combination with other herbal ingredients  
313 to prevent or manage many diseases[10, 11, 13]. Salidroside, an active constituent extracted  
314 from *Rhodiola rosea*, have the most critical therapeutic activities. It can provide a protective  
315 effect on epirubicin-induced early left ventricular regional systolic dysfunction for breast cancer  
316 patients by its antioxidant properties[10]. Salidroside also possesses antiviral activities against  
317 coxsackievirus B3 (CVB3) by adjusting antioxidant defense and regulating cytokine  
318 expression[9]. Salidroside is viewed as a promising neuroprotective drug for Alzheimer's  
319 disease (AD) because it modulated oxidative stress and inflammatory mediators[9]. Moreover,  
320 salidroside can inhibit clinorotation-induced apoptosis in pulmonary microvascular endothelial  
321 cells through PI3K/AKT pathway [16]. In particular, the anti-inflammatory effects  
322 of salidroside were investigated on LPS-induced ALI in mice and LPS-stimulated RAW 264.7  
323 macrophages[17]. Results shown that salidroside increased mouse survival, alleviated the  
324 production of inflammatory cytokines including tumor necrosis factor- $\alpha$  (TNF- $\alpha$ ), interleukin-  
325 6 (IL-6) and interleukin-1 $\beta$  (IL-1 $\beta$ ), and blocked the activation of NF- $\kappa$ B and ERK/MAPKs  
326 signalling pathways[18]. These results may provide a potential mechanism that explains the  
327 anti-inflammatory and antioxidant activities of salidroside and suggest a possible use of  
328 salidroside in the treatment of inflammatory diseases.

329 In the present study, we found that salidroside significantly reduced mortality, prolonged  
330 survival time of rats, attenuated the severity of ALI and relieved pulmonary edema and vascular  
331 permeability. The histopathologic results showed that there were great improvements after  
332 salidroside treatment. The increased wet-to-dry ratios, lung-to body weight ratios, MPO activity  
333 were markedly reduced by treatment of salidroside. Additionally, 2 $\mu$ M of salidroside protected  
334 A549 cells from LPS-induced injury as revealed by MTT assay. All above results suggested the  
335 potential role of salidroside in improvement of lung injury.

336 Furthermore, we investigated the possible mechanism of salidroside protective effects  
337 against ALI. It is well known that PLA<sub>2</sub> one of the important mediators contributing to  
338 ALI/ARDS. PLA<sub>2</sub> disturbs pulmonary function by hydrolyzing lung surfactant phospholipids  
339 and produces a large amount of pro-inflammatory arachidonic acids[6], which leads to the  
340 representative pathological changes of ALI/ARDS characterized by the increased alveolar-  
341 capillary barrier permeability and lung oedema formation[7]. PLA<sub>2</sub>s are now segregated into  
342 six major classes based on biochemical properties: secretory PLA<sub>2</sub>s (sPLA<sub>2</sub>s), cytoplasmic  
343 PLA<sub>2</sub>s (cPLA<sub>2</sub>s), calcium-independent PLA<sub>2</sub>s (iPLA<sub>2</sub>s), lysosomal PLA<sub>2</sub>s, platelet-activating  
344 factor acetylhydrolases (PAF-AHs), and PLA<sub>2</sub>s of bacterial origin[5]. Almost all of these PLA<sub>2</sub>  
345 isoforms have been reported to contribute to the process of lung infection and inflammation.  
346 Administration of PLA<sub>2</sub> inhibitors, such as S-5920/LY315920Na and arachidonyl  
347 trifluoromethyl ketone could attenuate LPS-induced ALI[7]. Consequently, modulating the  
348 PLA<sub>2</sub> activity may represent a therapeutic approach to ALI/ARDS. In the current study, we  
349 found that LPS aggrandized PLA<sub>2</sub> activity both in BALF and in the supernatants of A549 cell,  
350 increased cPLA<sub>2</sub> expression in the lung tissues, whereas salidroside could down-regulate the  
351 increased PLA<sub>2</sub> activity and cPLA<sub>2</sub> expression induced by LPS. Moreover, salidroside reduced  
352 the release of PGE<sub>2</sub>, LTB<sub>4</sub> and TXB<sub>2</sub>, which further confirms that salidroside inhibited LPS-  
353 induced PLA<sub>2</sub> activity.

354 MicroRNAs are small non-coding RNA that plays a crucial role in many disease processes,  
355 including malignancy, inflammation, metabolism and repair processes. Abnormal expression  
356 miRNAs, such as miR-27, miR-377, miR-30b and miR-218 have been found in ALI[14, 19].  
357 MiR-145 is an important molecular marker, which has been proven to mediate lung  
358 ischemia/reperfusion injury[20]. And Xu Qi et al. displayed that cPLA<sub>2</sub> contributed to cerebral  
359 infarction is a target of miR-145[21]. These studies demonstrated that miR-145 may be  
360 implicated in cPLA<sub>2</sub> regulation in ALI. However, whether salidroside attenuated LPS-induced

361 ALI both *in vivo* and *in vitro* was involved in miR-145 and cPLA<sub>2</sub> remain unknown. In our  
362 study, we found that the expression of miR-145 was up-regulated by salidroside, and miR-145  
363 inhibitor significantly alleviated the protective effect of salidroside on LPS injured A549 cells.

364 There were still limitations of this study. First, determining the particular role of PLA<sub>2</sub> on  
365 ALI/ARDS has proven quite challenging, because this enzyme represents a family of over 20  
366 distinct proteins with various structural and biochemical characteristics. So what kind of PLA<sub>2</sub>  
367 isoforms involved in the protective effect of salidroside on LPS-induced ALI remains to be  
368 further elucidated. We will further investigate the core mechanism responsible for the anti-  
369 inflammatory effects of salidroside by using specific PLA<sub>2</sub> inhibitors or other methods. Second,  
370 it is also important to reiterate the relationship of salidroside, miR-145 and the individual PLA<sub>2</sub>  
371 enzymes, which also needs to be tapped in further studies.

## 372 **5 Conclusion**

373 Although it requires further investigation, our results suggested that treatment with  
374 salidroside could significantly reduce lethality in LPS-treated rats, attenuated the severity of  
375 LPS-induced lung injury both *in vivo* and *in vitro*. The protection of salidroside was probably  
376 associated with the up-regulation of miR-145 and the inhibition of cPLA<sub>2</sub>. Conclusively, the  
377 present study partially explained the anti-inflammation capacity of salidroside. It may be  
378 considered as a potential agent in treatment for ALI/ARDS.

379

380

381

## 382 **Conflict of interest**

383 None.

384

## 385 **Acknowledgements**

386 This work was supported by Natural Science Foundation of Shaanxi Province of China  
387 (2019JQ-544).

388

## 389 **References**

- 390 [1] Y. Butt, A. Kurdowska, T.C. Allen, Acute Lung Injury: A Clinical and Molecular Review, Arch Pathol  
391 Lab Med, 140 (2016) 345-350.
- 392 [2] S. Spadaro, M. Park, C. Turrini, T. Tunstall, R. Thwaites, T. Mauri, R. Ragazzi, P. Ruggeri, T.T. Hansel,  
393 G. Caramori, C.A. Volta, Biomarkers for Acute Respiratory Distress syndrome and prospects for  
394 personalised medicine, J Inflamm (Lond), 16 (2019) 1.
- 395 [3] S.A. Kuldane, M. Kelher, C.C. Silliman, Risk factors, management and prevention of transfusion-related  
396 acute lung injury: a comprehensive update, Expert Rev Hematol, 12 (2019) 773-785.
- 397 [4] M. Camprubi-Rimblas, N. Tantinya, J. Bringue, R. Guillamat-Prats, A. Artigas, Anticoagulant therapy in  
398 acute respiratory distress syndrome, Ann Transl Med, 6 (2018) 36.
- 399 [5] A. Aloulou, R. Rahier, Y. Arhab, A. Noiriel, A. Abousalham, Phospholipases: An Overview, Methods  
400 Mol Biol, 1835 (2018) 69-105.
- 401 [6] M. Murakami, H. Sato, Y. Taketomi, Updating Phospholipase A2 Biology, Biomolecules, 10 (2020).
- 402 [7] E. Kitsiouli, M. Tenopoulou, S. Papadopoulos, M.E. Lekka, Phospholipases A2 as biomarkers in ARDS,  
403 Biomed J, (2021).
- 404 [8] S.Y. Filkin, A.V. Lipkin, A.N. Fedorov, Phospholipase Superfamily: Structure, Functions, and  
405 Biotechnological Applications, Biochemistry (Mosc), 85 (2020) S177-S195.
- 406 [9] X.L. Bai, X.L. Deng, G.J. Wu, W.J. Li, S. Jin, Rhodiola and salidroside in the treatment of metabolic  
407 disorders, Mini Rev Med Chem, 19 (2019) 1611-1626.
- 408 [10] S. Sun, Q. Tuo, D. Li, X. Wang, X. Li, Y. Zhang, G. Zhao, F. Lin, Antioxidant Effects of Salidroside in  
409 the Cardiovascular System, Evid Based Complement Alternat Med, 2020 (2020) 9568647.
- 410 [11] F. Fan, L. Yang, R. Li, X. Zou, N. Li, X. Meng, Y. Zhang, X. Wang, Salidroside as a potential  
411 neuroprotective agent for ischemic stroke: a review of sources, pharmacokinetics, mechanism and safety,  
412 Biomed Pharmacother, 129 (2020) 110458.



- 413 [12] Z. Zhong, J. Han, J. Zhang, Q. Xiao, J. Hu, L. Chen, Pharmacological activities, mechanisms of action,  
414 and safety of salidroside in the central nervous system, *Drug Des Devel Ther*, 12 (2018) 1479-1489.
- 415 [13] W.L. Pu, M.Y. Zhang, R.Y. Bai, L.K. Sun, W.H. Li, Y.L. Yu, Y. Zhang, L. Song, Z.X. Wang, Y.F. Peng,  
416 H. Shi, K. Zhou, T.X. Li, Anti-inflammatory effects of *Rhodiola rosea* L.: A review, *Biomed*  
417 *Pharmacother*, 121 (2020) 109552.
- 418 [14] S. Rajasekaran, D. Pattarayan, P. Rajaguru, P.S. Sudhakar Gandhi, R.K. Thimmulappa, MicroRNA  
419 Regulation of Acute Lung Injury and Acute Respiratory Distress Syndrome, *J Cell Physiol*, 231 (2016)  
420 2097-2106.
- 421 [15] Y. Han, S.C. Mu, J.L. Wang, W. Wei, M. Zhu, S.L. Du, M. Min, Y.J. Xu, Z.J. Song, C.Y. Tong,  
422 MicroRNA-145 plays a role in mitochondrial dysfunction in alveolar epithelial cells in  
423 lipopolysaccharide-induced acute respiratory distress syndrome, *World J Emerg Med*, 12 (2021) 54-60.
- 424 [16] Y. Wang, C.F. Xu, Y.J. Liu, Y.F. Mao, Z. Lv, S.Y. Li, X.Y. Zhu, L. Jiang, Salidroside Attenuates  
425 Ventilation Induced Lung Injury via SIRT1-Dependent Inhibition of NLRP3 Inflammasome, *Cell Physiol*  
426 *Biochem*, 42 (2017) 34-43.
- 427 [17] L. Jingyan, G. Yujuan, Y. Yiming, Z. Lingpeng, Y. Tianhua, M. Mingxing, Salidroside Attenuates LPS-  
428 Induced Acute Lung Injury in Rats, *Inflammation*, 40 (2017) 1520-1531.
- 429 [18] K.C. Lan, S.C. Chao, H.Y. Wu, C.L. Chiang, C.C. Wang, S.H. Liu, T.I. Weng, Salidroside ameliorates  
430 sepsis-induced acute lung injury and mortality via downregulating NF-kappaB and HMGB1 pathways  
431 through the upregulation of SIRT1, *Sci Rep*, 7 (2017) 12026.
- 432 [19] L.K. Lee, L. Medzikovic, M. Eghbali, H.K. Eltzschig, X. Yuan, The Role of MicroRNAs in Acute  
433 Respiratory Distress Syndrome and Sepsis, From Targets to Therapies: A Narrative Review, *Anesth*  
434 *Analg*, 131 (2020) 1471-1484.
- 435 [20] S.H. Dai, L.J. Chen, W.H. Qi, C.L. Ye, G.W. Zou, W.C. Liu, B.T. Yu, J. Tang, microRNA-145 Inhibition  
436 Upregulates SIRT1 and Attenuates Autophagy in a Mouse Model of Lung Ischemia/Reperfusion Injury  
437 via NF-kappaB-dependent Beclin 1, *Transplantation*, 105 (2021) 529-539.
- 438 [21] X. Qi, M. Shao, H. Sun, Y. Shen, D. Meng, W. Huo, Long non-coding RNA SNHG14 promotes  
439 microglia activation by regulating miR-145-5p/PLA2G4A in cerebral infarction, *Neuroscience*, 348  
440 (2017) 98-106.

442 **Figure legends**

443 **Fig.1. Salidroside reduced LPS-induced accumulative mortalities and improved LPS-induced lung**  
444 **injury in rats.** (A) The chemical structure of salidroside (purity is 99%). (B) The effect of salidroside on  
445 LPS-induced accumulative mortalities. Rats were challenged by LPS (20mg/kg) with or without different  
446 doses of salidroside treatment (25, 50 or 100 mg/kg). Survival was observed for 12, 24, 36, 48, 60 and 72 h.  
447 Experiments were performed with littermate rats and each group contains 15 animals. Survival data were  
448 presented by the Kaplan Meier method and comparisons were made by the log rank test. \* $P < 0.05$  vs. control  
449 group, # $P < 0.05$  vs. LPS group. Effects of salidroside on lung wet/dry weight ratios (C), lung /body weight  
450 ratios (D), myeloperoxidase (MPO) activity (E) in lung tissues, were assessed, respectively. (F-G)  
451 Histopathologic examination was performed to assess inflammation scores. The bar represents 20  $\mu$ m. Data  
452 are means  $\pm$ S.D.,  $n = 10$ . \* $P < 0.05$  vs. control group, # $P < 0.05$  vs. LPS group.

453 **Fig.2. Salidroside raised the level of miR-145 and inhibited LPS-induced increment of PLA<sub>2</sub> and its**  
454 **metabolites in BALF.** The levels of miR-145 (A), the expression of cPLA<sub>2</sub> (B), and the levels of PLA<sub>2</sub>  
455 activity (C), prostaglandin E<sub>2</sub> (PGE<sub>2</sub>, D), leukotriene B<sub>4</sub> (LTB<sub>4</sub>, E) and thromboxane B<sub>2</sub> (TXB<sub>2</sub>, F) in  
456 bronchoalveolar lavage fluid (BALF) were assessed. Data are means  $\pm$ S. D.,  $n = 10$ . \* $P < 0.05$  vs. control  
457 group, # $P < 0.05$  vs. LPS group.

458 **Fig.3. Salidroside reversed LPS-induced reduction of A549 cell viability, upregulated miR-145 level**  
459 **and restrained LPS-induced increment of PLA<sub>2</sub>.** (A) A549 cells treated with different doses of salidroside  
460 (0, 0.5, 1, 2 $\mu$ M) after activation with LPS (1 $\mu$ g/ml), the viabilities were measured by MTT assay. The levels  
461 of miR-145 (B), PLA<sub>2</sub> activity (C), and the expression of cPLA<sub>2</sub> (D) were tested. Data are means  $\pm$ S. D. from  
462 three independent experiments. \* $P < 0.05$ .

463 **Fig.4. miR-145 inhibitor blocked the effects of salidroside on LPS-induced PLA<sub>2</sub> increment.** A549 cells  
464 were transfected with miR-145 inhibitor and its corresponding control to further explore the relationship of  
465 salidroside and miR-145. (A) A549 viabilities were measured by MTT assay. The levels of miR-145 (B),  
466 PLA<sub>2</sub> activity (C), and the expression of cPLA<sub>2</sub> (D) were also evaluated. Data are means  $\pm$ S. D. from three  
467 independent experiments. \* $P < 0.05$ .

468

469

470 Figure-1

471

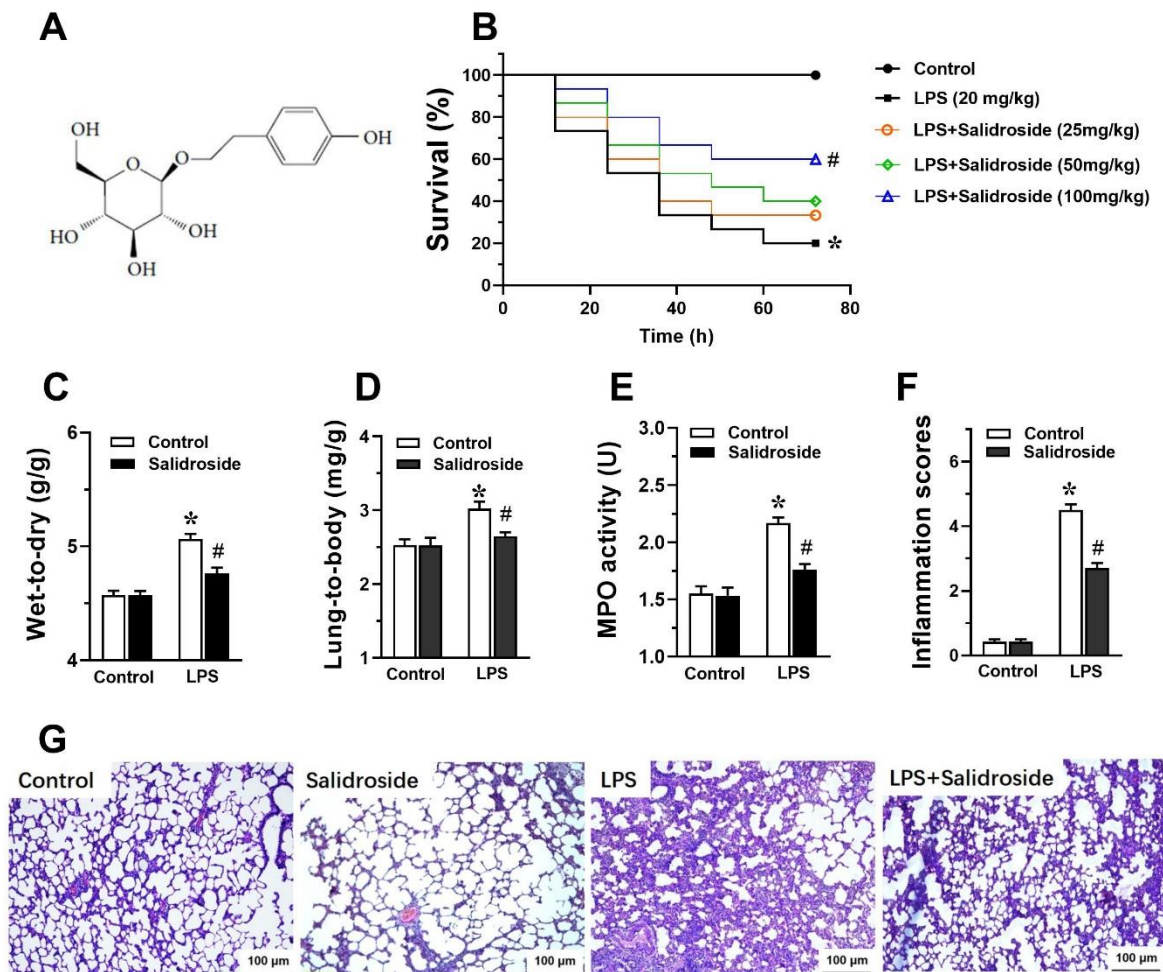

472

473 **Fig.1. Salidroside reduced LPS-induced accumulative mortalities and improved LPS-induced lung**

474 **injury in rats.** (A) The chemical structure of salidroside (purity is 99%). (B) The effect of salidroside on

475 LPS-induced accumulative mortalities. Rats were challenged by LPS (20mg/kg) with or without different

476 doses of salidroside treatment (25, 50 or 100 mg/kg). Survival was observed for 12, 24, 36, 48, 60 and 72 h.

477 Experiments were performed with littermate rats and each group contains 15 animals. Survival data were

478 presented by the Kaplan Meier method and comparisons were made by the log rank test. \* $P < 0.05$  vs. control

479 group, # $P < 0.05$  vs. LPS group. Effects of salidroside on lung wet/dry weight ratios (C), lung/body weight

480 ratios (D), myeloperoxidase (MPO) activity (E) in lung tissues, were assessed, respectively. (F-G)

481 Histopathologic examination was performed to assess inflammation scores. The bar represents 20  $\mu$ m. Data

482 are means  $\pm$ S.D.,  $n = 10$ . \* $P < 0.05$  vs. control group, # $P < 0.05$  vs. LPS group.

483

484 Figure-2

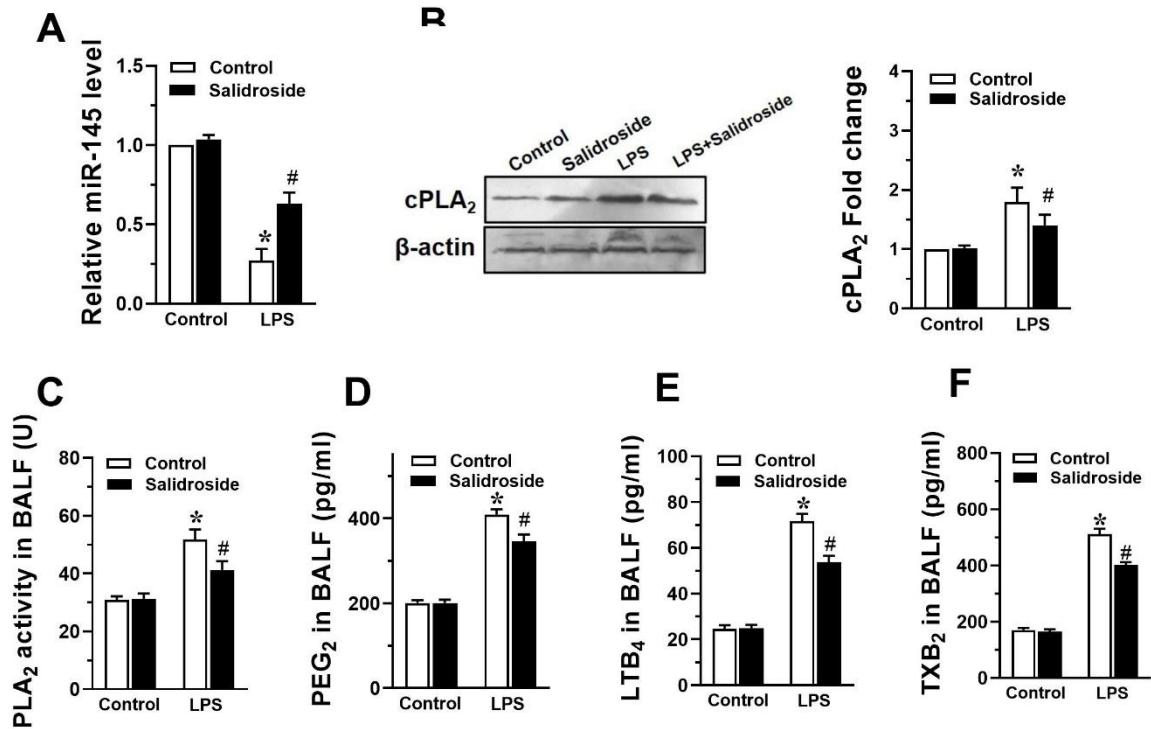

485

486 **Fig.2. Salidroside raised the level of miR-145 and inhibited LPS-induced increment of PLA<sub>2</sub> and its**  
487 **metabolites in BALF.** The levels of miR-145 (A), the expression of cPLA<sub>2</sub> (B), and the levels of PLA<sub>2</sub>  
488 activity (C), prostaglandin E<sub>2</sub> (PGE<sub>2</sub>, D), leukotriene B<sub>4</sub> (LTB<sub>4</sub>, E) and thromboxane B<sub>2</sub> (TXB<sub>2</sub>, F) in  
489 bronchoalveolar lavage fluid (BALF) were assessed. Data are means ±S. D., *n* = 10. \**P* < 0.05 vs. control  
490 group, #*P* < 0.05 vs. LPS group.

491

492

493

494

495

496

497

498

499

500

501 Figure-3

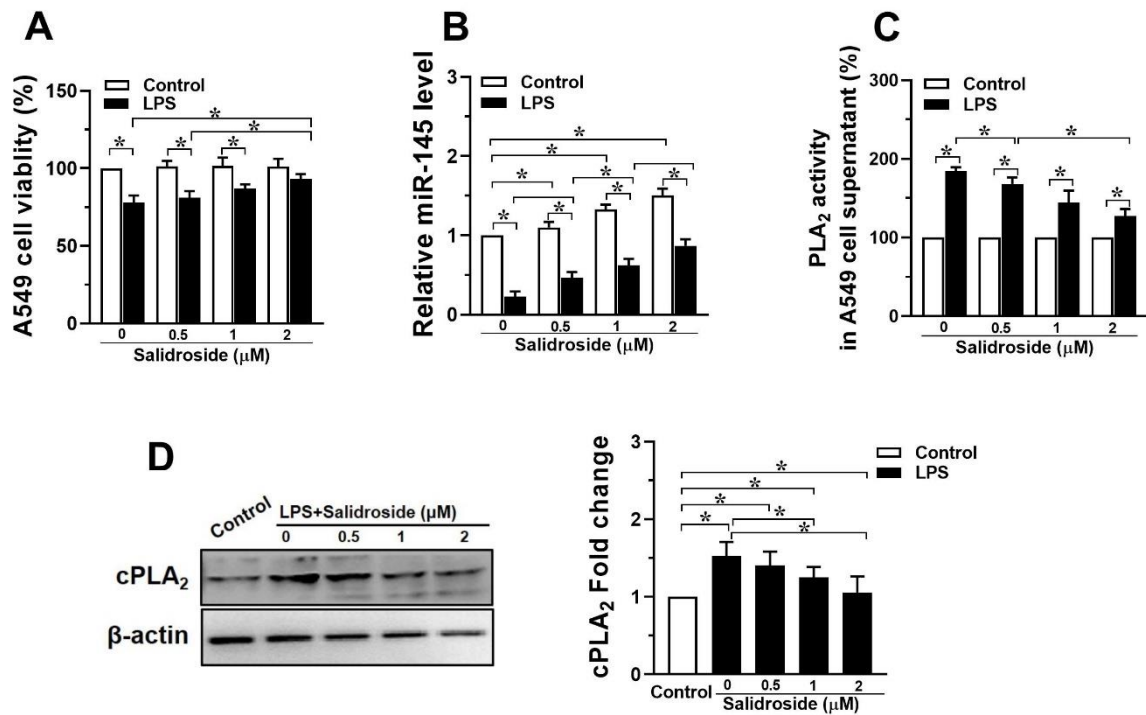

502

503 **Fig.3. Salidroside reversed LPS-induced reduction of A549 cell viability, upregulated miR-145 level**

504 **and restrained LPS-induced increment of PLA<sub>2</sub>.** (A) A549 cells treated with different doses of salidroside

505 (0, 0.5, 1, 2 $\mu\text{M}$ ) after activation with LPS (1 $\mu\text{g}/\text{ml}$ ), the viabilities were measured by MTT assay. The levels

506 of miR-145 (B), PLA<sub>2</sub> activity (C), and the expression of cPLA<sub>2</sub> (D) were tested. Data are means  $\pm$ S. D. from

507 three independent experiments. \* $P < 0.05$ .

508

509

510

511

512

513

514

515

516

517

518 Figure-4

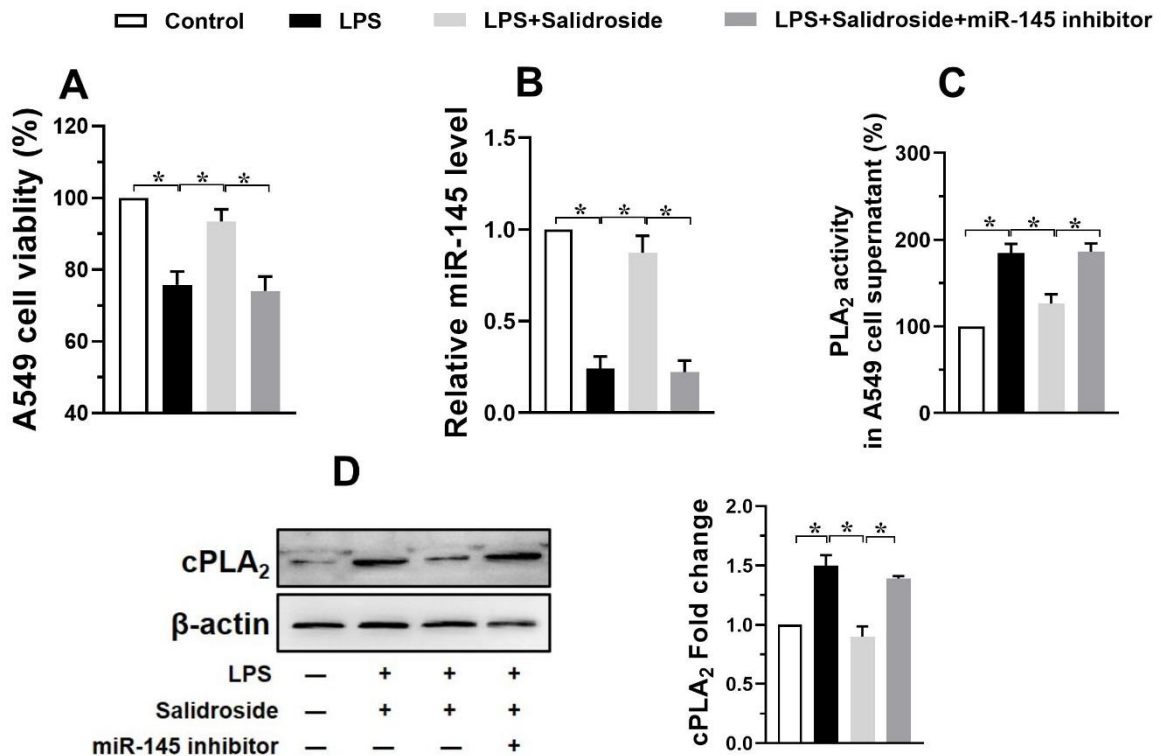

519

520 **Fig.4. miR-145 inhibitor blocked the effects of salidroside on LPS-induced PLA<sub>2</sub> increment.** A549 cells  
521 were transfected with miR-145 inhibitor and its corresponding control to further explore the relationship of  
522 salidroside and miR-145. (A) A549 viabilities were measured by MTT assay. The levels of miR-145 (B),  
523 PLA<sub>2</sub> activity (C), and the expression of cPLA<sub>2</sub> (D) were also evaluated. Data are means  $\pm$ S. D. from three  
524 independent experiments. \* $P < 0.05$ .

525

526

527

528

529

530

531

532

533
